# Supplementary material for: Gene supplementation of CYP27A1 in the liver restores bile acid metabolism in a mouse model of cerebrotendinous xanthomatosis
Source: PubMed Central journal article supplement — Mol Ther Methods Clin Dev. 2021 Jul 21;22:210–21. doi: 10.1016/j.omtm.2021.07.002 (PMC8399082; doi:10.1016/j.omtm.2021.07.002), 2021-07-21
Supplement: mmc1.pdf [file mmc1.pdf]

OMTM, Volume 22

## **Supplemental information**

### **Gene supplementation of *CYP27A1* in the liver restores bile acid metabolism in a mouse model of cerebrotendinous xanthomatosis**

**Sara Lumbreras, Ana Ricobaraza, Lucia Baila-Rueda, Manuela Gonzalez-Aparicio, Lucia Mora-Jimenez, Iker Uriarte, Maria Bunuales, Matias A. Avila, Maria J. Monte, Jose J.G. Marin, Ana Cenarro, Gloria Gonzalez-Aseguinolaza, and Ruben Hernandez-Alcoceba**

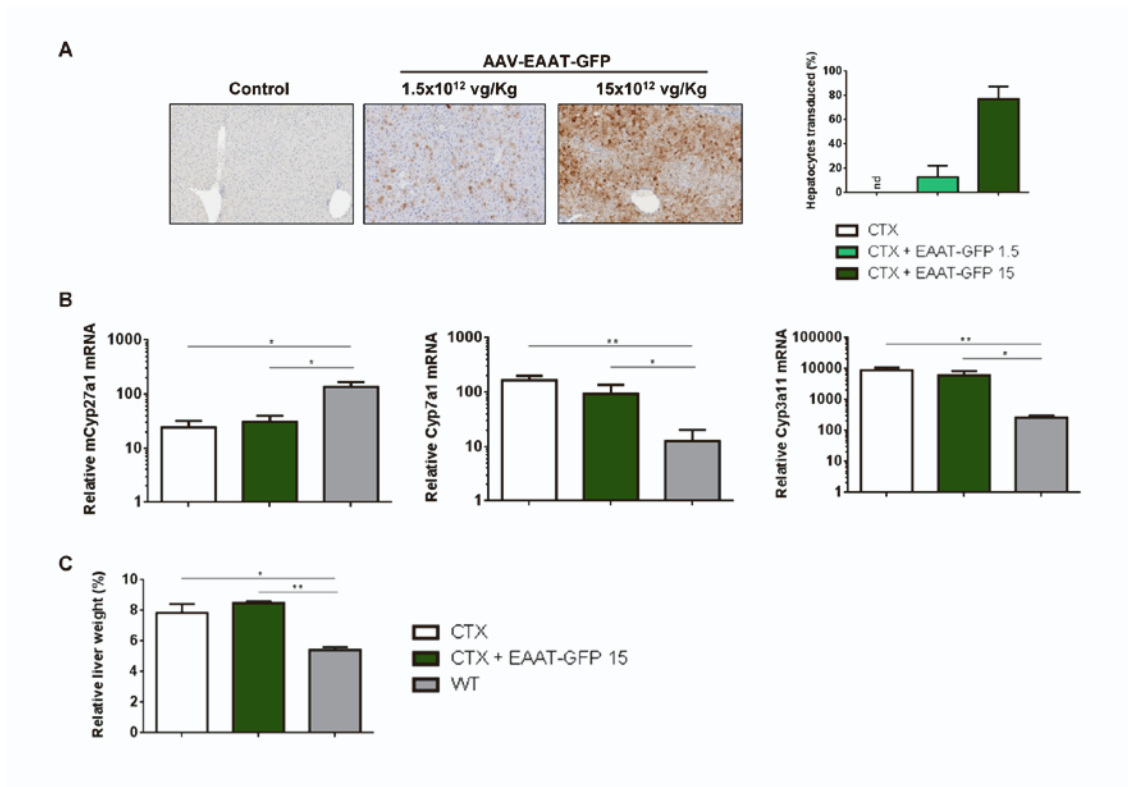

**Supplemental figure 1. The control vector AAV-EAAT-GFP shows dose-dependent transduction of mouse liver but has no effect on the expression of bile acid biosynthesis enzymes.** The AAV-EAAT-GFP vector was administered intravenously to 7 week-old CTX mice at the indicated doses ( $\times 10^{12}$  vg/Kg). Mice were sacrificed 2 weeks later, and livers samples were processed for anti-GFP immunohistochemistry (**A**) and quantification of mRNA expression of the indicated genes by qRT-PCR (**B**). Cyp27a1 was amplified using primers targeting exons 1/2. **C**. Liver weight relative to body weight (%). nd, not detected. \* $p < 0.05$ . Bars represent means  $\pm$  SEM for each group. \*\* $p < 0.01$ . Kruskal-Wallis with Dunn's post-test.

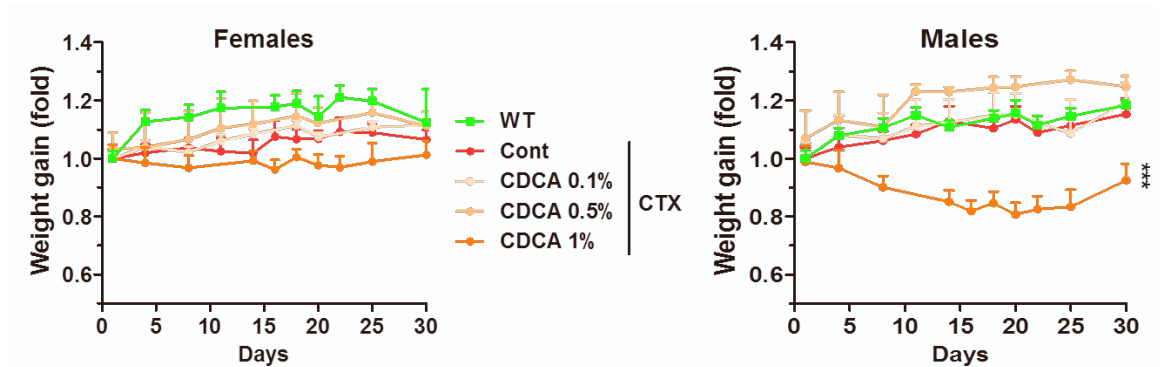

**Supplemental figure 2. A diet based on 1% CDCA causes weight loss in CTX mice.** Seven week-old female and male CTX mice were fed a diet supplemented with the indicated CDCA percentages, and body weight was monitored for one month. Untreated CTX and WT littermates were included as a reference. Symbols represent means  $\pm$  SEM for each group. \*\*\* $p < 0.001$  linear regression, control vs CDCA 1%.

**Supplemental table 1.** List of antibodies. B, Bovine; H, Human; M, Mouse; Mk, Monkey; Pg, Pig; R, Rat; Rb, Rabbit.

| <b>Primary antibodies</b>   | <b>Species reactivity</b> | <b>Source</b>                | <b>Catalog number</b> |
|-----------------------------|---------------------------|------------------------------|-----------------------|
| CYP27A1                     | H M R                     | Abcam                        | ab126785              |
| GAPDH                       | H M R Mk B Pg             | Cell Signaling<br>Technology | 3683                  |
| $\beta$ -catenine           | H M R Mk                  | Cell Signaling<br>Technology | 8480                  |
| Ki67                        | H M                       | Neomarkers                   | RM9106                |
| <b>Secondary antibodies</b> | <b>Species reactivity</b> | <b>Source</b>                | <b>Catalog number</b> |
| IgG HRP conjugated          | Rb                        | GE Healthcare                | NA934V                |
| IgG HRP conjugated          | Rb                        | DAKO                         | K4003                 |

**Supplementary table 2.** Concentration ( $\mu\text{M}$ ) of the main bile acids in plasma of CTX mice treated with AAV8-EAAT-CYP27A1 or 0.5% CDCA. The AAV8-EAAT-CYP27A1 vector was administered intravenously to 7 week-old CTX mice at the indicated doses ( $\times 10^{12}$  vg/Kg). CDCA was mixed in mouse chow at 0.5%. Untreated CTX and WT littermates were included as a reference. Blood was collected 5 months after the initiation of treatment, and the concentration of the main bile acids (free, tauroconjugated and glycoconjugated) was analyzed in plasma (expressed in  $\mu\text{M}$ ). See abbreviation list for full names.

|                               | WT                | CTX               | CTX EAAT 1.5      | CTX EAAT 15       | CTX 0.5% CDCA       |
|-------------------------------|-------------------|-------------------|-------------------|-------------------|---------------------|
| <b>CA</b>                     | 0,353 $\pm$ 0,267 | 0,165 $\pm$ 0,094 | 0,872 $\pm$ 1,250 | 1,101 $\pm$ 1,112 | 0,150 $\pm$ 0,201   |
| <b>TCA</b>                    | 0,316 $\pm$ 0,265 | 0,245 $\pm$ 0,429 | 1,267 $\pm$ 0,888 | 1,817 $\pm$ 0,939 | 0,003 $\pm$ 0,004   |
| <b>GCA</b>                    | 0,003 $\pm$ 0,003 | 0,001 $\pm$ 0,002 | 0,006 $\pm$ 0,004 | 0,028 $\pm$ 0,013 | 0,001 $\pm$ 0,001   |
| <b>DCA</b>                    | 0,244 $\pm$ 0,135 | 0,034 $\pm$ 0,014 | 0,431 $\pm$ 0,364 | 0,392 $\pm$ 0,149 | 0,005 $\pm$ 0,006   |
| <b>TDCA</b>                   | 0,102 $\pm$ 0,090 | 0,004 $\pm$ 0,004 | 0,149 $\pm$ 0,096 | 0,199 $\pm$ 0,079 | 0,009 $\pm$ 0,013   |
| <b>GDCA</b>                   | 0,000 $\pm$ 0,000   |
| <b>CDCA</b>                   | 0,055 $\pm$ 0,038 | 0,026 $\pm$ 0,010 | 0,053 $\pm$ 0,037 | 0,081 $\pm$ 0,070 | 58,620 $\pm$ 38,732 |
| <b>TCDCa</b>                  | 0,035 $\pm$ 0,021 | 0,021 $\pm$ 0,033 | 0,083 $\pm$ 0,054 | 0,088 $\pm$ 0,054 | 1,755 $\pm$ 2,418   |
| <b>GCDCA</b>                  | 0,000 $\pm$ 0,000   |
| <b>UDCA</b>                   | 0,109 $\pm$ 0,111 | 0,023 $\pm$ 0,031 | 0,173 $\pm$ 0,217 | 0,154 $\pm$ 0,133 | 30,160 $\pm$ 31,113 |
| <b>TUDCA</b>                  | 0,079 $\pm$ 0,061 | 0,006 $\pm$ 0,007 | 0,112 $\pm$ 0,087 | 0,150 $\pm$ 0,102 | 0,551 $\pm$ 0,828   |
| <b>GUDCA</b>                  | 0,000 $\pm$ 0,000   |
| <b>LCA</b>                    | 0,025 $\pm$ 0,015 | 0,020 $\pm$ 0,018 | 0,023 $\pm$ 0,059 | 0,019 $\pm$ 0,009 | 5,017 $\pm$ 3,131   |
| <b>TLCA</b>                   | 0,002 $\pm$ 0,001 | 0,002 $\pm$ 0,002 | 0,002 $\pm$ 0,002 | 0,002 $\pm$ 0,002 | 0,081 $\pm$ 0,030   |
| <b>TSLCA</b>                  | 0,000 $\pm$ 0,000 | 0,000 $\pm$ 0,000 | 0,000 $\pm$ 0,000 | 0,000 $\pm$ 0,000 | 0,445 $\pm$ 0,036   |
| <b>GLCA</b>                   | 0,000 $\pm$ 0,000   |
| <b><math>\alpha</math>MCA</b> | 0,503 $\pm$ 0,357 | 0,132 $\pm$ 0,113 | 0,617 $\pm$ 0,744 | 0,608 $\pm$ 0,387 | 8,236 $\pm$ 5,699   |
| <b><math>\beta</math>MCA</b>  | 0,373 $\pm$ 0,294 | 0,114 $\pm$ 0,066 | 0,593 $\pm$ 0,730 | 1,074 $\pm$ 0,928 | 7,923 $\pm$ 7,072   |
| <b>TMCAs</b>                  | 0,339 $\pm$ 0,221 | 0,055 $\pm$ 0,026 | 0,565 $\pm$ 0,530 | 1,345 $\pm$ 0,962 | 0,532 $\pm$ 0,586   |
| <b>HDCA</b>                   | 0,025 $\pm$ 0,023 | 0,010 $\pm$ 0,006 | 0,050 $\pm$ 0,066 | 0,019 $\pm$ 0,011 | 1,112 $\pm$ 1,525   |
| <b>THDCA</b>                  | 0,020 $\pm$ 0,019 | 0,001 $\pm$ 0,001 | 0,018 $\pm$ 0,012 | 0,040 $\pm$ 0,028 | 0,030 $\pm$ 0,020   |
| <b>THCA</b>                   | 0,000 $\pm$ 0,000   |
| <b>Total BAs</b>              | 2,583             | 0,860             | 5,013             | 7,119             | 114,629             |
